# Supplementary material for: Comparison of degradation features of lignin to phenols over Pt catalysts prepared with various forms of carbon supports
Source: Royal Society of Chemistry journal article supplement (doi:10.1039/c5ra21875f), 2016-01-01
Supplement: c5ra21875f1.pdf [file c5ra21875f1.pdf]

**Supplementary information**

**Comparison of degradation features of lignin to phenols over  
Pt catalysts prepared with various forms of carbon supports**

Jeesu Park<sup>a</sup>, Shinyoung Oh<sup>a</sup>, Jae-Young Kim<sup>a</sup>, Shin young Park<sup>a</sup>, In Kyu Song<sup>b</sup>,

Joon Weon Choi<sup>c\*</sup>

<sup>a</sup> Department of Forest Sciences, College of Agricultural and Life Science, Seoul National University, 599 Gwanak-ro, Gwanak-gu, Seoul, 151-921, Republic of Korea

<sup>b</sup> School of Chemical and Biological Engineering, Institute of Chemical Processes, Seoul National University, 599 Gwanak-ro, Gwanak-gu, Seoul, 151-921, Korea

<sup>c</sup> Graduate School of International Agricultural Technology and Institute of Green-Bio Science and Technology, Seoul National University, Pyeongchang 232-916, Republic of Korea

\* Corresponding author. Tel: +82-33-339-5840; Fax: +82-33-339-5689

E-mail address: [cjw@snu.ac.kr](mailto:cjw@snu.ac.kr)

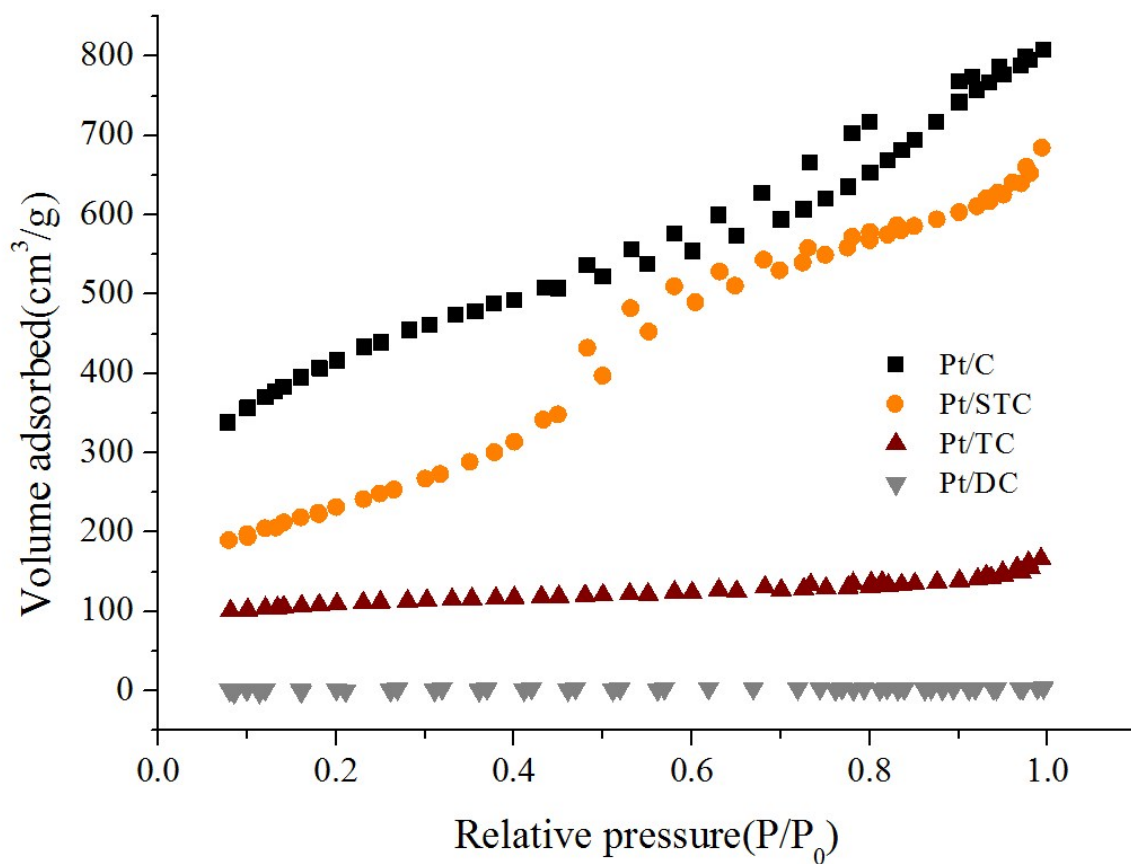

**Figure S1. Nitrogen adsorption-desorption isotherms of carbon supported Pt catalysts**

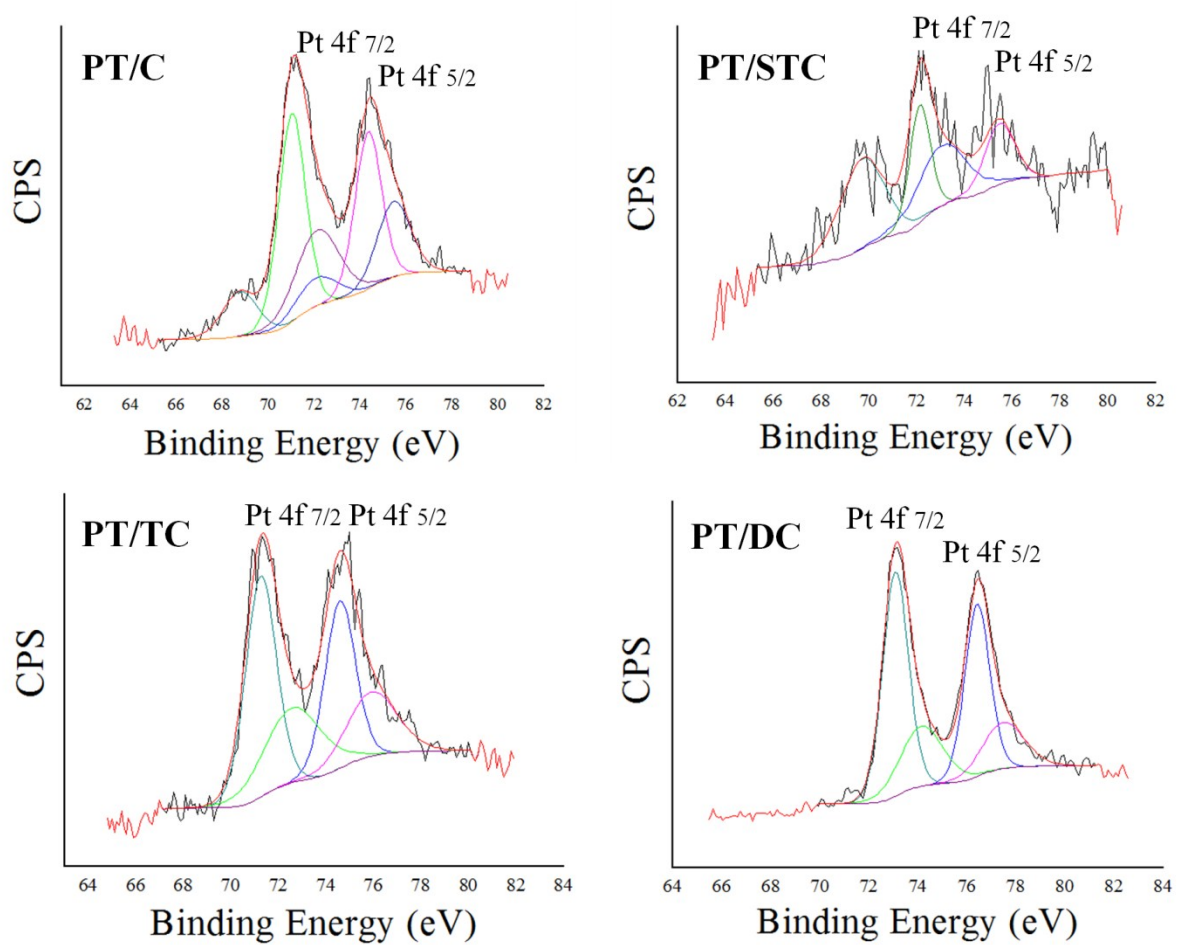

**Figure S2. Pt 4f electron spectra of Pt/C, Pt/STC, Pt/TC and Pt/DC**

**Table S1. Yield of depolymerized lignin oil under various reaction conditions**

| Catalyst<br>(5wt%) | Reaction conditions |                  |                     | Yield of depolymerized lignin oil |
|--------------------|---------------------|------------------|---------------------|-----------------------------------|
|                    | Solvent type        | Temperature (°C) | Reaction time (min) | Lignin Oil (wt%)                  |
| Pt/C               | EtOH                | 350              | 40                  | 77.4 (1.5)                        |
|                    | MeOH                |                  |                     | 63.2 (2.5)                        |
|                    | 2-PrOH              |                  |                     | 74.5 (1.6)                        |
|                    | t-BuOH              |                  |                     | 58.4 (0.6)                        |
|                    | EtOH                | 300              | 40                  | 60.7 (2.1)                        |
|                    |                     | 250              |                     | 53.5 (1.3)                        |
|                    |                     | 200              |                     | 50.1 (1.8)                        |
|                    |                     | 120              | 52.4 (1.7)          |                                   |
|                    |                     | 350              | 240                 | 37.0 (1.6)                        |
|                    |                     | 350              | 360                 | 24.3 (2.0)                        |

**Table S2. Pt 4f<sub>7/2</sub> core binding energies, eV, in Pt/C, Pt/STC, Pt/TC and Pt/DC**

| Sample | 4f <sub>7/2</sub> |             |
|--------|-------------------|-------------|
|        | metal             | metal oxide |
| Pt/C   | 71.4 (72)         | 75.6 (28)   |
| Pt/STC | 72.1 (70)         | 75.5 (30)   |
| Pt/TC  | 72.1 (73)         | 76.0 (27)   |
| Pt/DC  | 73.1 (68)         | 76.1 (32)   |

\*The numbers in parentheses are the relative intensities of the species.
